# Supplementary material
Source: publisher figshare collection journal article supplement (https://rs.figshare.com/ndownloader/files/24193739)
Supplement: Supplementary file [file 24193739]

Electronic Supplementary Material, Datafile S1:  
AIC estimates of full models and final (selected) models

**Post-copulatory genetic matchmaking: HLA-dependent effects of cervical mucus on human sperm function**

Annalaura Jokiniemi, Martina Magris, Jarmo Ritari, Liisa Kuusipalo, Tuulia Lundgren, Jukka Partanen &  
Jukka Kekäläinen

*Proceedings of the Royal Society B* (DOI: 10.1098/rspb.2020.1682)

**1. Overall models for the effect of HLA-dissimilarity on sperm swimming velocity (VCL)**

Model 5A: Full model with Timepoint \* HLA dissimilarity interaction

Model\_5A = lmer (VCL ~ 1 + Timepoint \* HLA\_dissimilarity + (Timepoint|Sub-sample) + (Timepoint|Sub-sample:Replicate) + (Timepoint|Male) + (Timepoint|Female) + (Timepoint|Male:Female), data = All\_timepoints)  
AIC = 6965.6

Model 5B: Like Model 5A, but without Timepoint \* HLA dissimilarity interaction

Model\_5B = lmer (VCL ~ 1 + Timepoint + HLA\_dissimilarity + (Timepoint|Sub-sample) + (Timepoint|Sub-sample:Replicate) + (Timepoint|Male) + (Timepoint|Female) + (Timepoint|Male:Female), data = All\_timepoints)  
AIC = 6965.4 (Final model)

**2. Overall models for the effect of Genomic dissimilarity on sperm swimming velocity (VCL)**

Model 6A: Full model with Timepoint \* Genomic dissimilarity interaction

Model\_6A = lmer (VCL ~ 1 + Timepoint \* Genomic\_dissimilarity + (Timepoint|Sub-sample) + (Timepoint|Sub-sample:Replicate) + (Timepoint|Male) + (Timepoint|Female) + (Timepoint|Male:Female), data = All\_timepoints)  
AIC = 6929.6

Model 6B: Like Model 6A, but random slope, (Timepoint|Sub-sample:replicate), replaced with random intercept, (1|Sub-sample:replicate)

Model\_6B = lmer (VCL ~ 1 + Timepoint \* Genomic\_dissimilarity + (Timepoint|Sub-sample) + (1|Sub-sample:Replicate) + (Timepoint|Male) + (Timepoint|Female) + (Timepoint|Male:Female), data = All\_timepoints)  
AIC = 6919.6 (Final model)

Model 6C: Like Model 6B, but without Timepoint \* Genomic dissimilarity interaction

Model\_6C = lmer (VCL ~ 1 + Timepoint + Genomic\_dissimilarity + (Timepoint|Sub-sample) + (1|Sub-sample:Replicate) + (Timepoint|Male) + (Timepoint|Female) + (Timepoint|Male:Female), data = All\_timepoints)  
AIC = 6941.7

### 3. Overall models for the effect of HLA-dissimilarity on sperm hyperactivation

#### Model 2A: Full model with Timepoint \* HLA dissimilarity interaction

Model\_2A = lmer (Hyperactivation ~ 1 + Timepoint \* HLA\_dissimilarity + (Timepoint|Sub-sample) + (Timepoint|Sub-sample:Replicate) + (Timepoint|Male) + (Timepoint|Female) + (Timepoint|Male:Female), data = All\_timepoints)  
AIC = 5651.3

#### Model 2B: Like Model 2A, but without Timepoint \* HLA dissimilarity interaction

Model\_2B = lmer (Hyperactivation ~ 1 + Timepoint + HLA\_dissimilarity + (Timepoint|Sub-sample) + (Timepoint|Sub-sample:Replicate) + (Timepoint|Male) + (Timepoint|Female) + (Timepoint|Male:Female), data = All\_timepoints)  
AIC = 5647.7 (Final model)

### 4. Overall models for the effect of Genomic dissimilarity on sperm hyperactivation

#### Model 3A: Full model with Timepoint \* Genomic dissimilarity interaction

Model\_3A = lmer (Hyperactivation ~ 1 + Timepoint \* Genomic\_dissimilarity + (Timepoint|Sub-sample) + (Timepoint|Sub-sample:Replicate) + (Timepoint|Male) + (Timepoint|Female) + (Timepoint|Male:Female), data = All\_timepoints)  
AIC = 5616.9

#### Model 3B: Like Model 3A, but random slope, (Timepoint|Sub-sample:replicate), replaced with random intercept, (1|Sub-sample:replicate)

Model\_3B = lmer (Hyperactivation ~ 1 + Timepoint \* Genomic\_dissimilarity + (Timepoint|Sub-sample) + (1|Sub-sample:Replicate) + (Timepoint|Male) + (Timepoint|Female) + (Timepoint|Male:Female), data = All\_timepoints)  
AIC = 5607.1 (Final model)

#### Model 3C: Like Model 3B, but without Timepoint \* Genomic dissimilarity interaction

Model\_3C = lmer (Hyperactivation ~ 1 + Timepoint + Genomic\_dissimilarity + (Timepoint|Sub-sample) + (1|Sub-sample:Replicate) + (Timepoint|Male) + (Timepoint|Female) + (Timepoint|Male:Female), data = All\_timepoints)  
AIC = 5625.5

### 5. Overall models for the effect of Grantham distance on sperm swimming velocity (VCL)

#### Model 4A: Full model with Timepoint \* Grantham interaction

Model\_4A = lmer (VCL ~ 1 + Timepoint \* Grantham + (Timepoint|Sub-sample) + (Timepoint|Sub-sample:Replicate) + (Timepoint|Male) + (Timepoint|Female) + (Timepoint|Male:Female), data = All\_timepoints)  
AIC = 6949.8 (Final model)

#### Model 4B: Like Model 4A, but without Timepoint \* Grantham interaction

Model\_4B = lmer (VCL ~ 1 + Timepoint + Grantham + (Timepoint|Sub-sample) + (Timepoint|Sub-sample:Replicate) + (Timepoint|Male) + (Timepoint|Female) + (Timepoint|Male:Female), data = All\_timepoints)  
AIC = 6962.1

## 6. Overall models for the effect of Grantham distance on sperm hyperactivation

### Model 1A: Full model with Timepoint \* Grantham interaction

Model\_1A = lmer (Hyperactivation ~ 1 + Timepoint \* Grantham + (Timepoint|Sub-sample) + (Timepoint|Sub-sample:Replicate) + (Timepoint|Male) + (Timepoint|Female) + (Timepoint|Male:Female), data = All\_timepoints)  
AIC = 5634.4 (Final model)

### Model 1B: Like Model 1A, but without Timepoint \* Grantham interaction

Model\_1B = lmer (Hyperactivation ~ 1 + Timepoint + Grantham + (Timepoint|Sub-sample) + (Timepoint|Sub-sample:Replicate) + (Timepoint|Male) + (Timepoint|Female) + (Timepoint|Male:Female) , data = All\_timepoints)  
AIC = 5643.3

## 7. The effect of Grantham distance on sperm swimming velocity (VCL) at 180 min

### Model 8A: Full model with random slope, (Grantham|male)

Model\_8A = lmer (VCL ~ 1 + (1|Sub-sample) + (1|Sub-sample:Replicate) + Grantham + (Grantham|Male) + (1|Male) + (1|Female) + (1|Male:Female), data = Time\_180)  
AIC = 2377.6

### Model 8B: Like Model 8A, but without (1|male)

Model\_8B = lmer (VCL ~ 1 + (1|Sub-sample) + (1|Sub-sample:Replicate) + Grantham + (Grantham|Male) + (1|Female) + (1|Male:Female), data = Time\_180)  
AIC = 2375.6 (Final model)

### Model 8C: Like Model 8A, but without (Grantham|male)

Model\_8C = lmer (VCL\_180 ~ 1 + (1|Sub-sample) + (1|Sub-sample:Replicate) + Grantham + (1|Male) + (1|Female) + (1|Male:Female), data = Time\_180)  
AIC = 2382.5

## 8. The effect of Grantham distance on sperm hyperactivation at 180 min

### Model 7A: Full model with random slope, (Grantham|male)

Model\_7A = lmer (Hyperactivation ~ 1 + (1|Sub-sample) + (1|Sub-sample:Replicate) + Grantham + (Grantham|Male) + (1|Male) + (1|Female) + (1|Male:Female), data = Time\_180)  
AIC = 1925.9

### Model 7B: Like Model 7A, but without (1|male)

Model\_7B = lmer (Hyperactivation ~ 1 + (1|Sub-sample) + (1|Sub-sample:Replicate) + Grantham + (Grantham|Male) + (1|Female) + (1|Male:Female), data = Time\_180)  
AIC = 1923.9 (Final model)

### Model 7C: Like Model 7A, but without (Grantham|male)

Model\_7C = lmer (Hyperactivation ~ 1 + (1|Sub-sample) + (1|Sub-sample:Replicate) + Grantham + (1|Male) + (1|Female) + (1|Male:Female), data = Time\_180)  
AIC = 1934.2

## 9. The effect of HLA-dissimilarity on sperm viability

Model 10A: Full model with random slope, (HLA\_dissimilarity|male)

Model\_10A = lmer (Viability ~ 1 + (1|Sub-sample) + (1|Sub-sample:Replicate) + HLA\_dissimilarity + (HLA\_dissimilarity|Male) + (1|Male) + (1|Female) + (1|Male:Female), data = Viability)  
AIC = 1552.7

Model 10B: Like Model 10A, but without (HLA\_dissimilarity|male)

Model\_10B = lmer (Viability ~ 1 + (1|Sub-sample) + (1|Sub-sample:Replicate) + HLA\_dissimilarity + (1|Male) + (1|Female) + (1|Male:Female), data = Viability)  
AIC = 1551.3 (Final model)

## 10. The effect of Grantham distance on sperm viability

Model 9A: Full model with random slope, (Grantham|male)

Model\_9A = lmer (Viability ~ 1 + (1|Sub-sample) + (1|Sub-sample:Replicate) + Grantham + (Grantham|Male) + (1|Male) + (1|Female) + (1|Male:Female), data = Viability)  
AIC = 1556.0

Model 9B: Like Model 9A, but without (Grantham|male)

Model\_9B = lmer (Viability ~ 1 + (1|Sub-sample) + (1|Sub-sample:Replicate) + Grantham + (1|Male) + (1|Female) + (1|Male:Female), data = Viability)  
AIC = 1555.3 (Final model)

## 11. The effect of Genomic dissimilarity on sperm viability

Model 11A: Full model with random slope, (Genomic\_dissimilarity|male)

Model\_11A = lmer (Viability ~ 1 + (1|Sub-sample) + (1|Sub-sample:Replicate) + Genomic\_dissimilarity + (Genomic\_dissimilarity|Male) + (1|Male) + (1|Female) + (1|Male:Female), data = Viability)  
AIC = 1559.9

Model 11B: Like Model 11A, but without (Genomic\_dissimilarity|male)

Model\_11B = lmer (Viability ~ 1 + (1|Sub-sample) + (1|Sub-sample:Replicate) + Genomic\_dissimilarity + (1|Male) + (1|Female) + (1|Male:Female), data = Viability)  
AIC = 1554.6 (Final model)
